# Supplementary figures and images for: Accelerated screening of Cu–Ga–Fe oxide semiconductors by combinatorial spray deposition and high-throughput analysis
Source: Royal Society of Chemistry journal article supplement (doi:10.1039/d3ma00136a), 2023-01-01

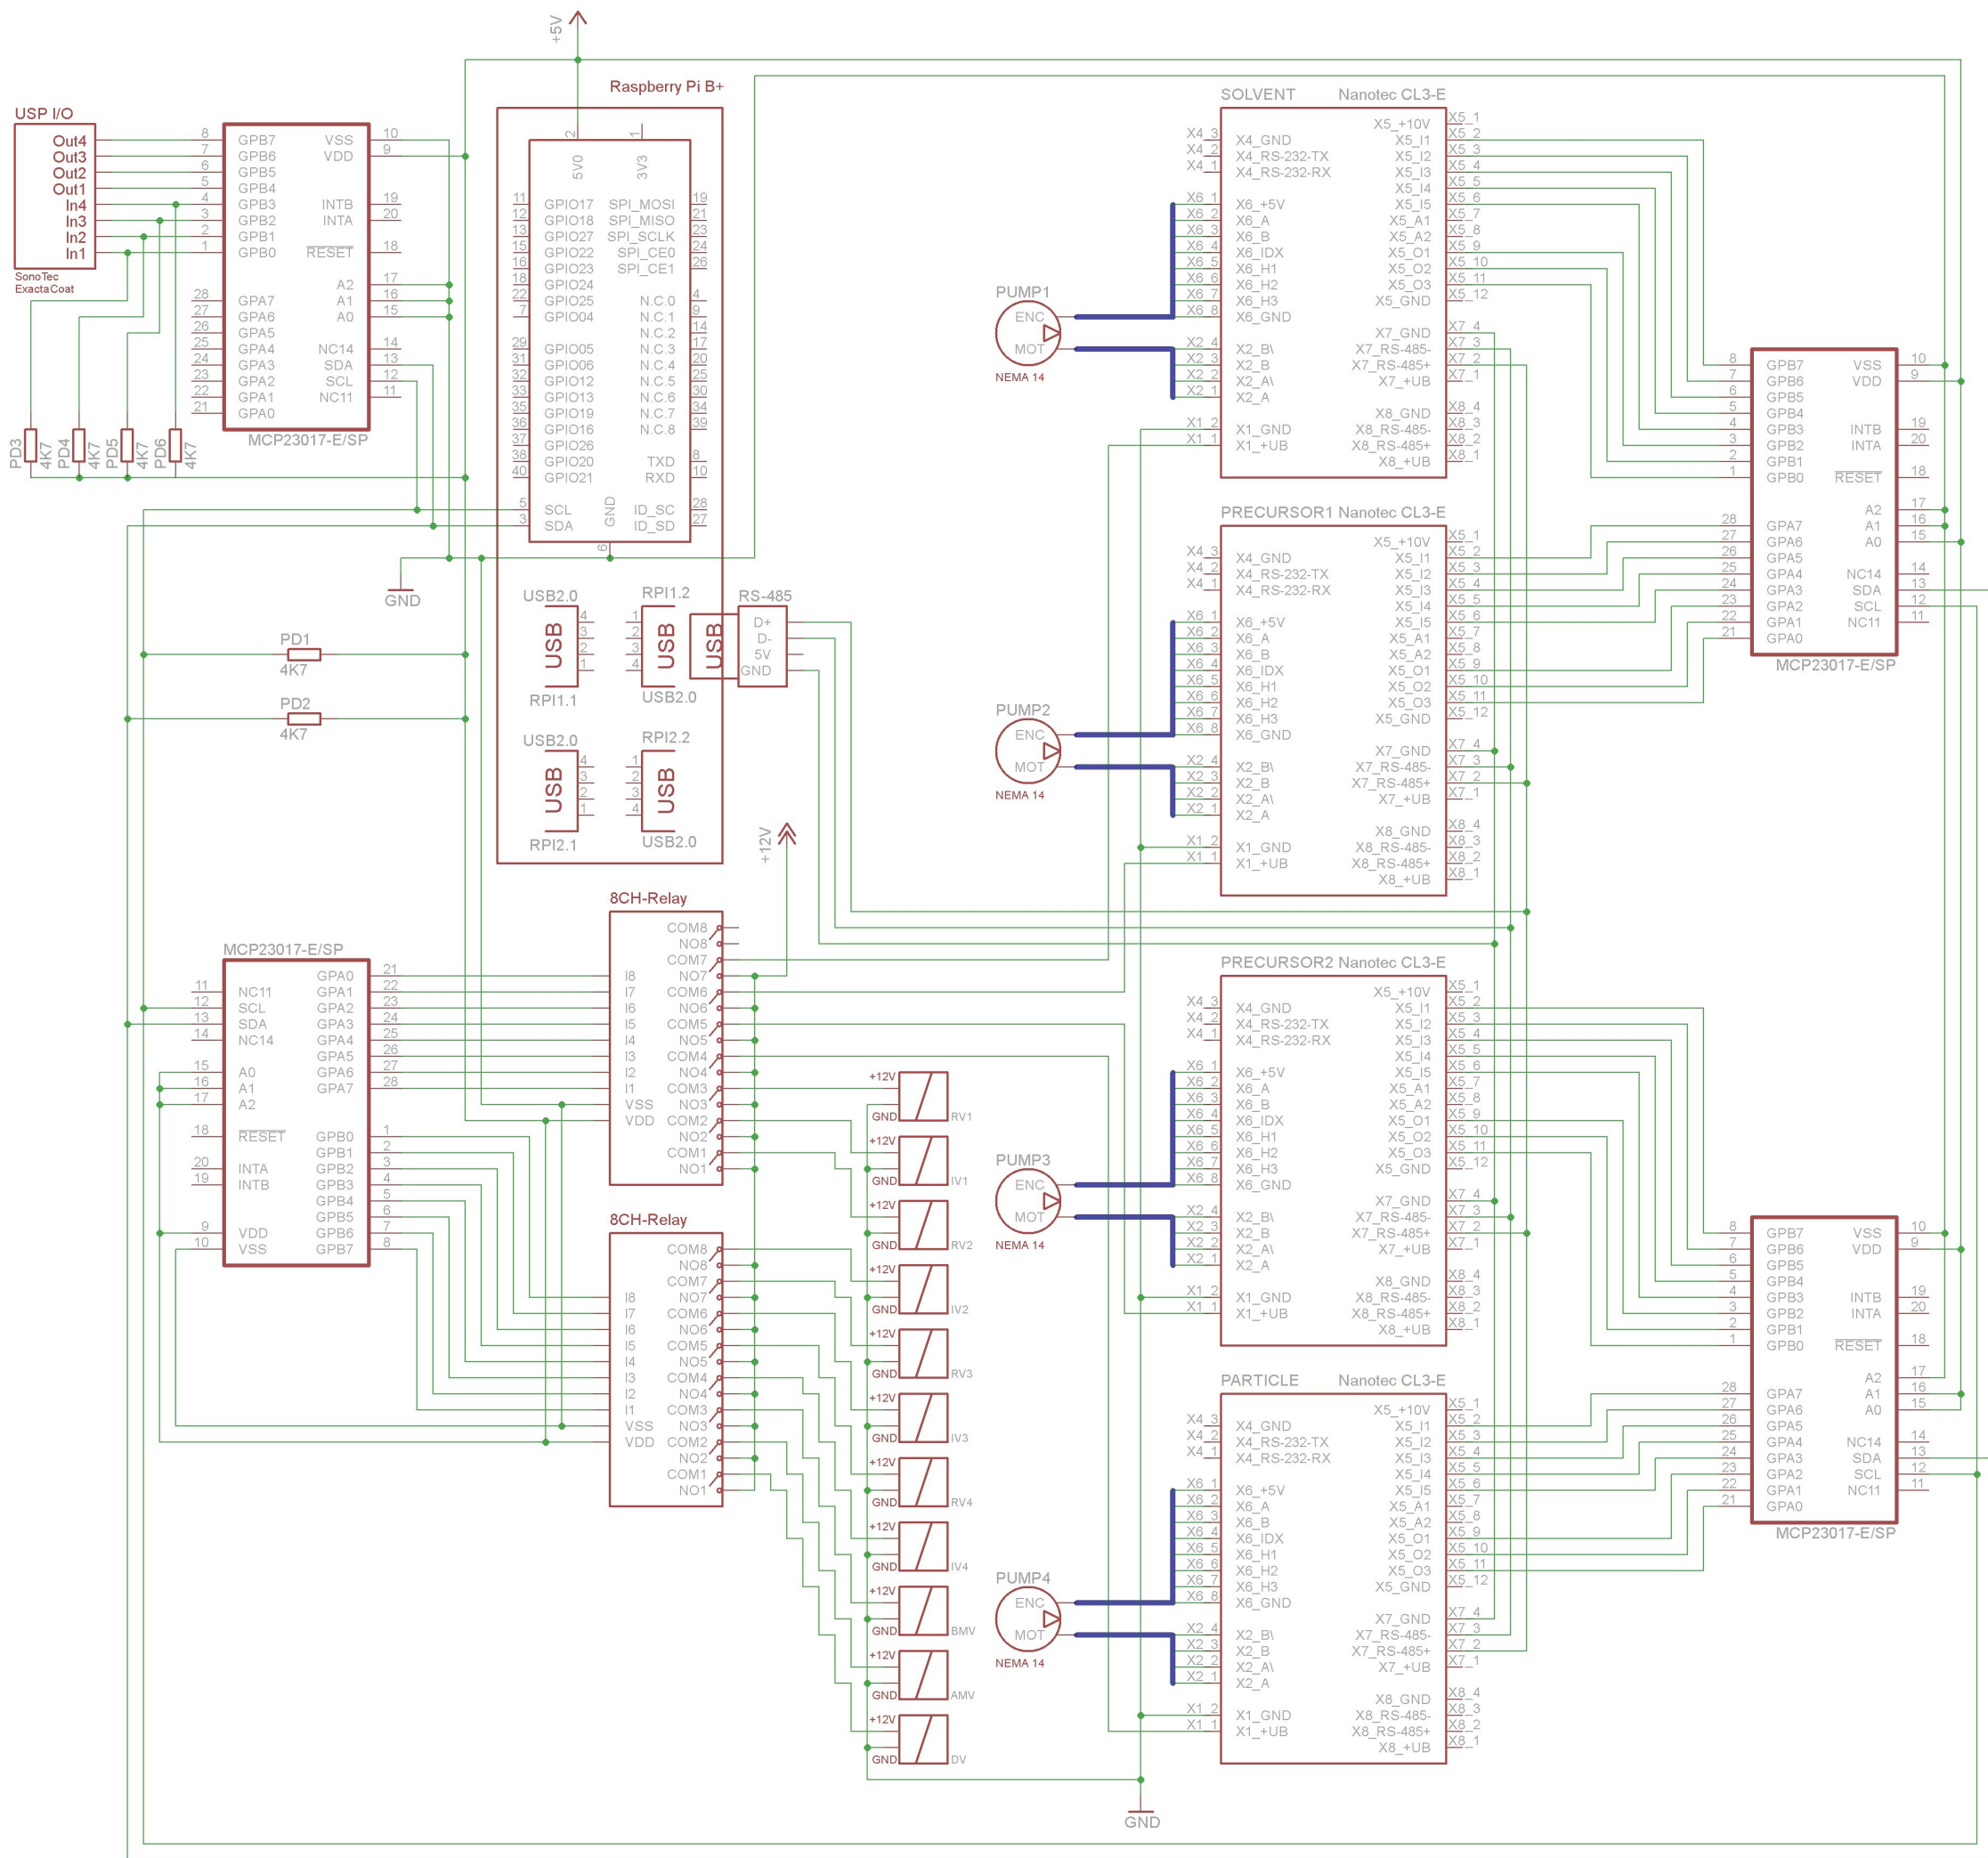

Supplement: d3ma00136a1.pdf [file d3ma00136a1.pdf]
